# Supplementary material for: Integration of population-level data sources into an individual-level clinical prediction model for dengue virus test positivity
Source: PubMed Central journal article supplement (PMC10871531; doi:10.1126/sciadv.adj9786), 2024-02-16
Supplement: sciadv.adj9786_sm.pdf [file sciadv.adj9786_sm.pdf]

Supplementary Materials for  
**Integration of population-level data sources into an individual-level clinical  
prediction model for dengue virus test positivity**

Robert J. Williams *et al.*

Corresponding author: Daniel T. Leung, [daniel.leung@utah.edu](mailto:daniel.leung@utah.edu); Henrik Salje, [hs743@cam.ac.uk](mailto:hs743@cam.ac.uk)

*Sci. Adv.* **10**, eadj9786 (2024)  
DOI: 10.1126/sciadv.adj9786

**This PDF file includes:**

Fig. S1  
Tables S1 to S4

| Section/Topic                | Item | Checklist Item                                                                                                                                                                                        | Page  |
|------------------------------|------|-------------------------------------------------------------------------------------------------------------------------------------------------------------------------------------------------------|-------|
| <b>Title and abstract</b>    |      |                                                                                                                                                                                                       |       |
| Title                        | 1    | Identify the study as developing and/or validating a multivariable prediction model, the target population, and the outcome to be predicted.                                                          | 1     |
| Abstract                     | 2    | Provide a summary of objectives, study design, setting, participants, sample size, predictors, outcome, statistical analysis, results, and conclusions.                                               | 2     |
| <b>Introduction</b>          |      |                                                                                                                                                                                                       |       |
| Background and objectives    | 3a   | Explain the medical context (including whether diagnostic or prognostic) and rationale for developing or validating the multivariable prediction model, including references to existing models.      | 3     |
|                              | 3b   | Specify the objectives, including whether the study describes the development or validation of the model or both.                                                                                     | 3-4   |
| <b>Methods</b>               |      |                                                                                                                                                                                                       |       |
| Source of data               | 4a   | Describe the study design or source of data (e.g., randomized trial, cohort, or registry data), separately for the development and validation data sets, if applicable.                               | 4-5   |
|                              | 4b   | Specify the key study dates, including start of accrual; end of accrual; and, if applicable, end of follow-up.                                                                                        | 4-5   |
| Participants                 | 5a   | Specify key elements of the study setting (e.g., primary care, secondary care, general population) including number and location of centres.                                                          | 4     |
|                              | 5b   | Describe eligibility criteria for participants.                                                                                                                                                       | 4     |
|                              | 5c   | Give details of treatments received, if relevant.                                                                                                                                                     | N/A   |
| Outcome                      | 6a   | Clearly define the outcome that is predicted by the prediction model, including how and when assessed.                                                                                                | 4     |
|                              | 6b   | Report any actions to blind assessment of the outcome to be predicted.                                                                                                                                | N/A   |
| Predictors                   | 7a   | Clearly define all predictors used in developing or validating the multivariable prediction model, including how and when they were measured.                                                         | 4-6   |
|                              | 7b   | Report any actions to blind assessment of predictors for the outcome and other predictors.                                                                                                            | N/A   |
| Sample size                  | 8    | Explain how the study size was arrived at.                                                                                                                                                            | 4     |
| Missing data                 | 9    | Describe how missing data were handled (e.g., complete-case analysis, single imputation, multiple imputation) with details of any imputation method.                                                  | 6     |
| Statistical analysis methods | 10a  | Describe how predictors were handled in the analyses.                                                                                                                                                 | 6     |
|                              | 10b  | Specify type of model, all model-building procedures (including any predictor selection), and method for internal validation.                                                                         | 6     |
|                              | 10d  | Specify all measures used to assess model performance and, if relevant, to compare multiple models.                                                                                                   | 6     |
| Risk groups                  | 11   | Provide details on how risk groups were created, if done.                                                                                                                                             | N/A   |
| <b>Results</b>               |      |                                                                                                                                                                                                       |       |
| Participants                 | 13a  | Describe the flow of participants through the study, including the number of participants with and without the outcome and, if applicable, a summary of the follow-up time. A diagram may be helpful. | 7     |
|                              | 13b  | Describe the characteristics of the participants (basic demographics, clinical features, available predictors), including the number of participants with missing data for predictors and outcome.    | 7     |
| Model development            | 14a  | Specify the number of participants and outcome events in each analysis.                                                                                                                               | 7     |
|                              | 14b  | If done, report the unadjusted association between each candidate predictor and outcome.                                                                                                              | N/A   |
| Model specification          | 15a  | Present the full prediction model to allow predictions for individuals (i.e., all regression coefficients, and model intercept or baseline survival at a given time point).                           | 9-13  |
|                              | 15b  | Explain how to use the prediction model.                                                                                                                                                              | 9-13  |
| Model performance            | 16   | Report performance measures (with CIs) for the prediction model.                                                                                                                                      | 9-13  |
| <b>Discussion</b>            |      |                                                                                                                                                                                                       |       |
| Limitations                  | 18   | Discuss any limitations of the study (such as nonrepresentative sample, few events per predictor, missing data).                                                                                      | 15    |
| Interpretation               | 19b  | Give an overall interpretation of the results, considering objectives, limitations, and results from similar studies, and other relevant evidence.                                                    | 14-15 |
| Implications                 | 20   | Discuss the potential clinical use of the model and implications for future research.                                                                                                                 | 14-15 |
| <b>Other information</b>     |      |                                                                                                                                                                                                       |       |
| Supplementary information    | 21   | Provide information about the availability of supplementary resources, such as study protocol, Web calculator, and data sets.                                                                         | 19-22 |
| Funding                      | 22   | Give the source of funding and the role of the funders for the present study.                                                                                                                         | 15    |

**Supplementary Table S1. TRIPOD checklist.**

| Clinical Predictors | DENV Negative | DENV Positive | OR   | 95% CI    |
|---------------------|---------------|---------------|------|-----------|
| Fever               |               |               | 2.15 | 1.87-2.47 |
| No                  | 971 (14%)     | 391 (6.8%)    |      |           |
| Yes                 | 6,127 (86%)   | 5,337 (93%)   |      |           |
| Nausea              |               |               | 1.66 | 1.53-1.79 |
| No                  | 4,044 (57%)   | 2,543 (44%)   |      |           |
| Yes                 | 3,054 (43%)   | 3,185 (56%)   |      |           |
| Headache            |               |               | 1.53 | 1.4-1.67  |
| No                  | 2,304 (32%)   | 1,371 (24%)   |      |           |
| Yes                 | 4,794 (68%)   | 4,357 (76%)   |      |           |
| Emesis              |               |               | 1.50 | 1.39-1.62 |
| No                  | 4,126 (58%)   | 2,754 (48%)   |      |           |
| Yes                 | 2,972 (42%)   | 2,974 (52%)   |      |           |
| Malaise             |               |               | 1.33 | 1.23-1.44 |
| No                  | 3,687 (52%)   | 2,569 (45%)   |      |           |
| Yes                 | 3,411 (48%)   | 3,159 (55%)   |      |           |
| Anorexia            |               |               | 1.33 | 1.22-1.44 |
| No                  | 4,611 (65%)   | 3,340 (58%)   |      |           |
| Yes                 | 2,487 (35%)   | 2,388 (42%)   |      |           |
| Abdominal Pain      |               |               | 1.27 | 1.17-1.38 |
| No                  | 4,815 (68%)   | 3,570 (62%)   |      |           |
| Yes                 | 2,283 (32%)   | 2,158 (38%)   |      |           |
| Myalgias            |               |               | 1.26 | 1.16-1.36 |
| No                  | 3,638 (51%)   | 2,607 (46%)   |      |           |
| Yes                 | 3,460 (49%)   | 3,121 (54%)   |      |           |
| Chills              |               |               | 1.20 | 1.11-1.3  |
| No                  | 4,139 (58%)   | 3,078 (54%)   |      |           |
| Yes                 | 2,959 (42%)   | 2,650 (46%)   |      |           |
| Retro-orbital Pain  |               |               | 1.16 | 1.06-1.28 |
| No                  | 5,506 (78%)   | 4,284 (75%)   |      |           |
| Yes                 | 1,592 (22%)   | 1,444 (25%)   |      |           |
| Hemorrhage          |               |               | 1.16 | 1.05-1.29 |
| No                  | 5,951 (84%)   | 4,677 (82%)   |      |           |
| Yes                 | 1,147 (16%)   | 1,051 (18%)   |      |           |
| Diarrhea            |               |               | 1.06 | 0.97-1.16 |
| No                  | 5,401 (76%)   | 4,297 (75%)   |      |           |
| Yes                 | 1,697 (24%)   | 1,431 (25%)   |      |           |
| Arthralgias         |               |               | 1.05 | 0.96-1.15 |
| No                  | 5,198 (73%)   | 4,134 (72%)   |      |           |
| Yes                 | 1,900 (27%)   | 1,594 (28%)   |      |           |

|                   |             |             |      |           |
|-------------------|-------------|-------------|------|-----------|
| Rash              |             |             | 1.02 | 0.93-1.12 |
| No                | 5,507 (78%) | 4,426 (77%) |      |           |
| Yes               | 1,591 (22%) | 1,302 (23%) |      |           |
| Age               |             |             | 0.98 | 0.98-0.98 |
|                   | 23 (18)     | 18 (11)     |      |           |
| Dark Urine        |             |             | 0.86 | 0.75-1    |
| No                | 6,502 (92%) | 5,306 (93%) |      |           |
| Yes               | 596 (8.4%)  | 422 (7.4%)  |      |           |
| Seizure           |             |             | 0.83 | 0.69-0.99 |
| No                | 6,704 (94%) | 5,461 (95%) |      |           |
| Yes               | 394 (5.6%)  | 267 (4.7%)  |      |           |
| Abnormal Movement |             |             | 0.79 | 0.67-0.93 |
| No                | 6,622 (93%) | 5,423 (95%) |      |           |
| Yes               | 476 (6.7%)  | 305 (5.3%)  |      |           |
| Nuchal Rigidity   |             |             | 0.77 | 0.63-0.94 |
| No                | 6,764 (95%) | 5,516 (96%) |      |           |
| Yes               | 334 (4.7%)  | 212 (3.7%)  |      |           |
| Pharyngitis       |             |             | 0.76 | 0.7-0.83  |
| No                | 4,978 (70%) | 4,322 (75%) |      |           |
| Yes               | 2,120 (30%) | 1,406 (25%) |      |           |
| Jaundice          |             |             | 0.63 | 0.51-0.78 |
| No                | 6,761 (95%) | 5,552 (97%) |      |           |
| Yes               | 337 (4.7%)  | 176 (3.1%)  |      |           |
| Cough             |             |             | 0.55 | 0.51-0.6  |
| No                | 4,039 (57%) | 4,044 (71%) |      |           |
| Yes               | 3,059 (43%) | 1,684 (29%) |      |           |
| Rhinitis          |             |             | 0.55 | 0.49-0.61 |
| No                | 5,641 (79%) | 5,017 (88%) |      |           |
| Yes               | 1,457 (21%) | 711 (12%)   |      |           |

**Supplementary Table S2.** The relative frequencies, odds ratios, and confidence intervals for each clinical variable by DENV positivity.

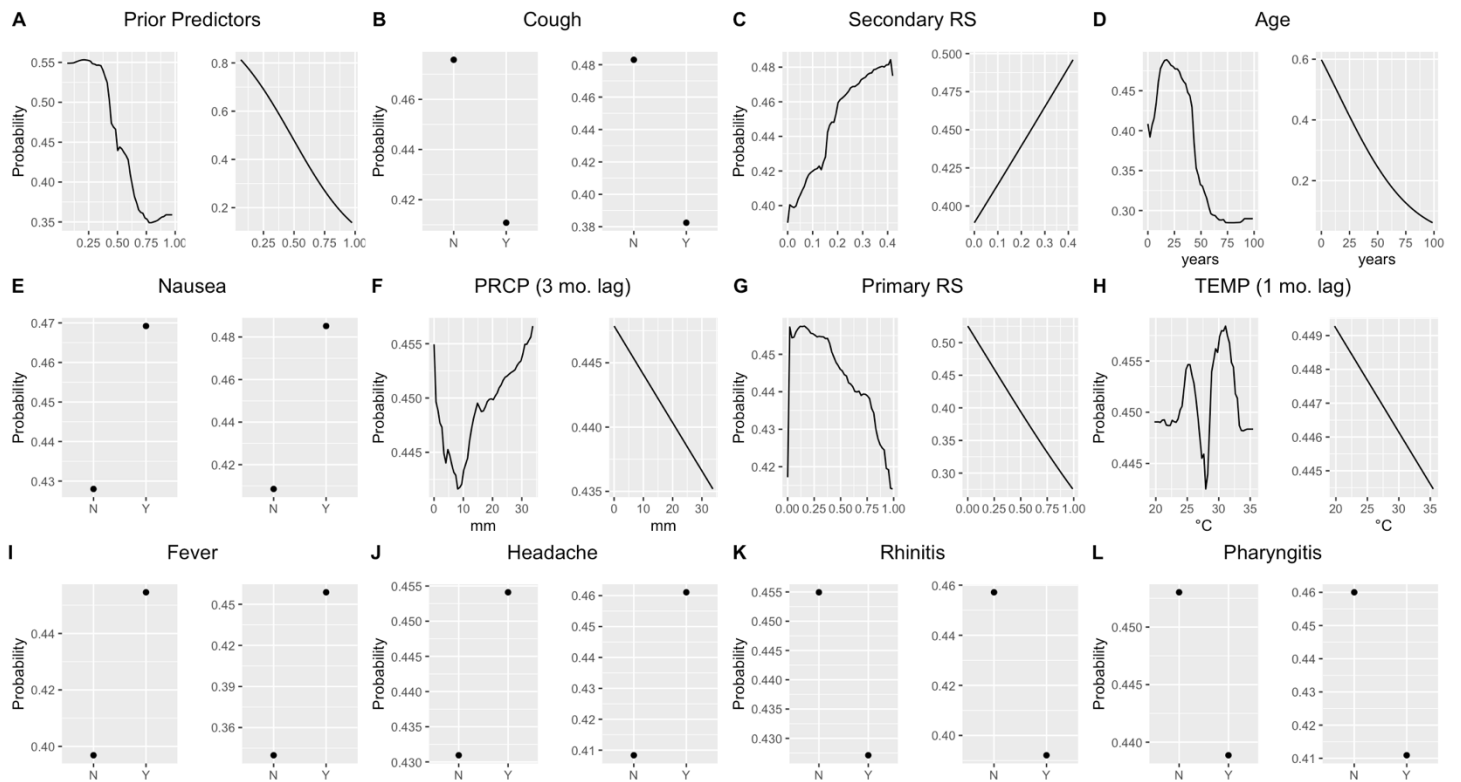

**Supplementary Figure S1.** Partial Dependency Plots for the top performing variables for predicting DENV infection by AUC. For each predictor, the graph on the left shows the partial dependency for a random forest model and the partial dependency for a logistic regression model is shown on the right. 'Y' indicates presence of the symptom and 'N' indicates absence of a symptom. 'PRCP' refers to precipitation, 'TEMP' refers to the environmental temperature, 'RS' refers to reconstructed susceptibility estimates.

|               | Overall, N<br>= 12,826 <sup>1</sup> | 0-4 years,<br>N = 954 <sup>1</sup> | 5-9 years,<br>N = 2,033 <sup>1</sup> | 10-14<br>years, N<br>= 2,971 <sup>1</sup> | 15-19<br>years,<br>N = 2,271 <sup>1</sup> | 20-24<br>years,<br>N = 1,174 <sup>1</sup> | 25-29<br>years,<br>N = 875 <sup>1</sup> | 30-34<br>years,<br>N = 624 <sup>1</sup> | 35-39<br>years,<br>N = 448 <sup>1</sup> | 40+ years,<br>N = 1,476 <sup>1</sup> | p-value <sup>2</sup> |
|---------------|-------------------------------------|------------------------------------|--------------------------------------|-------------------------------------------|-------------------------------------------|-------------------------------------------|-----------------------------------------|-----------------------------------------|-----------------------------------------|--------------------------------------|----------------------|
| <b>Nausea</b> |                                     |                                    |                                      |                                           |                                           |                                           |                                         |                                         |                                         |                                      | <0.001               |
| Y             | 6,239 (49)                          | 341 (36)                           | 952 (47)                             | 1,515<br>(51)                             | 1,239 (55)                                | 646 (55)                                  | 447 (51)                                | 320 (51)                                | 208 (46)                                | 571 (39)                             |                      |
| <b>Cough</b>  |                                     |                                    |                                      |                                           |                                           |                                           |                                         |                                         |                                         |                                      | <0.001               |
| Y             | 4,743 (37)                          | 514 (54)                           | 840 (41)                             | 1,034<br>(35)                             | 790 (35)                                  | 413 (35)                                  | 282 (32)                                | 212 (34)                                | 146 (33)                                | 512 (35)                             |                      |

<sup>1</sup>n (%)

<sup>2</sup>Pearson's Chi-squared test

**Supplementary Table S3.** The relative frequency of the top performing clinical variables stratified by age group. 'Y' indicates presence of the symptom and 'N' indicates absence of a symptom.

| Climate Predictors<br>(months lagged) | DENV Negative<br>Mean (sd) | DENV Positive<br>Mean (sd) | OR   | 95% CI    |
|---------------------------------------|----------------------------|----------------------------|------|-----------|
| DEWPT                                 | 23.3°C (2.2)               | 23.7°C (1.8)               | 1.10 | 1.08-1.12 |
| TEMP (1)                              | 28.4°C (1.7)               | 28.6°C (1.5)               | 1.08 | 1.05-1.11 |
| DEWPT (1)                             | 23.3°C (2.3)               | 23.6°C (1.9)               | 1.08 | 1.06-1.1  |
| VISIB                                 | 9.3 km (2.4)               | 9.5 km (2.1)               | 1.05 | 1.03-1.06 |
| TEMP                                  | 28.3°C (1.6)               | 28.4°C (1.4)               | 1.04 | 1.01-1.06 |
| PRCP                                  | 4.9 mm (4.5)               | 5.4 mm (4.6)               | 1.02 | 1.02-1.03 |
| RH                                    | 75.3 (9.0)                 | 76.6 (8.1)                 | 1.02 | 1.01-1.02 |
| RH (3)                                | 70.7 (9.3)                 | 69.8 (8.8)                 | 0.99 | 0.98-0.99 |
| PRCP (3)                              | 3.7 mm (4.1)               | 3.2 mm (3.9)               | 0.97 | 0.96-0.98 |
| SLP (1)                               | 1008.1 mbar (2.9)          | 1007.8 mbar<br>(2.6)       | 0.96 | 0.94-0.97 |
| SLP                                   | 1008.1 mbar (2.9)          | 1007.7 mbar<br>(2.7)       | 0.94 | 0.93-0.96 |
| VISIB (3)                             | 8.3 km (2.8)               | 7.7 km (2.9)               | 0.93 | 0.92-0.94 |
| WDSP                                  | 0.6 m/s (0.3)              | 0.6 m/s (0.3)              | 0.74 | 0.65-0.85 |
| WDSP (3)                              | 0.7 m/s (0.3)              | 0.7 m/s (0.3)              | 0.73 | 0.64-0.83 |

**Supplementary Table S4.** The mean, standard deviation, odds ratio, and 95% CI intervals for each climate predictor.
